# Supplementary material for: Memory effects of climate and vegetation affecting net ecosystem CO2 fluxes in global forests
Source: PubMed Central journal article supplement (PMC6364965; doi:10.1371/journal.pone.0211510), 2019-02-06
Supplement: pone.0211510.s002.pdf [file pone.0211510.s002.pdf]

**S2 Table. RMSE of the *LSTM* setup per PFT and climate region from the ensemble mean mean  $\pm$ sd estimate of the 50 runs.** Statistics for the anomalies were not calculated in the arid and tropical climate (i.e. NA) because there was no site with at least 2 years of complete data after data quality control.

|                  | Seasonal cycle         | Seasonal anomaly        | Across-site            | Interannual anomaly     |
|------------------|------------------------|-------------------------|------------------------|-------------------------|
| Deciduous forest | <b>1.18</b> $\pm$ 0.03 | <b>0.61</b> $\pm$ 0.01  | <b>0.51</b> $\pm$ 0.02 | <b>0.27</b> $\pm$ 0.007 |
| Evergreen forest | <b>1.15</b> $\pm$ 0.02 | <b>0.58</b> $\pm$ 0.006 | <b>0.72</b> $\pm$ 0.03 | <b>0.31</b> $\pm$ 0.006 |
| Mixed forest     | <b>1.10</b> $\pm$ 0.05 | <b>0.68</b> $\pm$ 0.007 | <b>0.50</b> $\pm$ 0.08 | <b>0.37</b> $\pm$ 0.008 |
| Savanna          | <b>0.75</b> $\pm$ 0.02 | <b>0.58</b> $\pm$ 0.007 | <b>0.34</b> $\pm$ 0.09 | <b>0.19</b> $\pm$ 0.01  |
| Arid             | <b>0.71</b> $\pm$ 0.03 | NA                      | <b>0.20</b> $\pm$ 0.07 | NA                      |
| Boreal           | <b>1.02</b> $\pm$ 0.02 | <b>0.45</b> $\pm$ 0.006 | <b>0.52</b> $\pm$ 0.03 | <b>0.18</b> $\pm$ 0.004 |
| Temperate        | <b>1.18</b> $\pm$ 0.02 | <b>0.71</b> $\pm$ 0.006 | <b>0.65</b> $\pm$ 0.03 | <b>0.38</b> $\pm$ 0.006 |
| Tropical         | <b>1.40</b> $\pm$ 0.08 | NA                      | <b>1.03</b> $\pm$ 0.12 | NA                      |
