# Supplementary material for: Memory effects of climate and vegetation affecting net ecosystem CO2 fluxes in global forests
Source: PubMed Central journal article supplement (PMC6364965; doi:10.1371/journal.pone.0211510), 2019-02-06
Supplement: pone.0211510.s003.pdf [file pone.0211510.s003.pdf]

**S3 Table. MAE of the *LSTM* setup per PFT and climate region from the ensemble mean mean  $\pm$ sd estimate of the 50 runs.** Statistics for the anomalies were not calculated in the arid and tropical climate (i.e. NA) because there was no site with at least 2 years of complete data after data quality control.

|                  | Seasonal cycle         | Seasonal anomaly        | Across-site            | Interannual anomaly     |
|------------------|------------------------|-------------------------|------------------------|-------------------------|
| Deciduous forest | <b>0.86</b> $\pm$ 0.03 | <b>0.42</b> $\pm$ 0.007 | <b>0.45</b> $\pm$ 0.02 | <b>0.20</b> $\pm$ 0.006 |
| Evergreen forest | <b>0.83</b> $\pm$ 0.02 | <b>0.40</b> $\pm$ 0.004 | <b>0.54</b> $\pm$ 0.03 | <b>0.20</b> $\pm$ 0.004 |
| Mixed forest     | <b>0.78</b> $\pm$ 0.05 | <b>0.47</b> $\pm$ 0.006 | <b>0.43</b> $\pm$ 0.05 | <b>0.29</b> $\pm$ 0.006 |
| Savanna          | <b>0.57</b> $\pm$ 0.02 | <b>0.46</b> $\pm$ 0.007 | <b>0.22</b> $\pm$ 0.06 | <b>0.16</b> $\pm$ 0.01  |
| Arid             | <b>0.50</b> $\pm$ 0.03 | NA                      | <b>0.16</b> $\pm$ 0.06 | NA                      |
| Boreal           | <b>0.68</b> $\pm$ 0.02 | <b>0.30</b> $\pm$ 0.004 | <b>0.37</b> $\pm$ 0.02 | <b>0.14</b> $\pm$ 0.003 |
| Temperate        | <b>0.89</b> $\pm$ 0.02 | <b>0.51</b> $\pm$ 0.005 | <b>0.54</b> $\pm$ 0.02 | <b>0.28</b> $\pm$ 0.005 |
| Tropical         | <b>1.12</b> $\pm$ 0.07 | NA                      | <b>0.85</b> $\pm$ 0.10 | NA                      |
