# Supplementary material for: Memory effects of climate and vegetation affecting net ecosystem CO2 fluxes in global forests
Source: PubMed Central journal article supplement (PMC6364965; doi:10.1371/journal.pone.0211510), 2019-02-06
Supplement: pone.0211510.s006.pdf [file pone.0211510.s006.pdf]

**S6 Table. MAE of our proposed approach against the other model set-ups from the ensemble mean mean  $\pm$ sd estimate of the 50 runs.** *LSTM* = LSTM model using the full depth of the Landsat time series and climate data; *LSTM<sub>perm</sub>* = *LSTM* model but the temporal patterns of both the predictive and the target variables were randomly permuted while instantaneous relationships between predictive and target variables were kept; *LSTM<sub>m<sub>sc</sub></sub>* = *LSTM* model but the Landsat time series for each band were replaced by their mean seasonal cycle, while using the actual values of air temperature ( $T_{air}$ ), precipitation (P), global radiation (Rg), and vapor pressure deficit (VPD); *LSTM<sub>annual</sub>* = *LSTM* model but the Landsat time series for each band were replaced by their annual mean, while using the actual values of  $T_{air}$ , P, Rg, and VPD, RF = Random Forest model using the actual values of the Landsat time series and climate data.

|                                | Seasonal                  | Seasonal anomaly          | Across-site              | Interannual anomaly       |
|--------------------------------|---------------------------|---------------------------|--------------------------|---------------------------|
| LSTM                           | <b>0.81</b> $\pm$ 0.01    | <b>0.42</b> $\pm$ 0.003   | <b>0.48</b> $\pm$ 0.02   | <b>0.22</b> $\pm$ 0.003   |
| LSTM <sub>m<sub>sc</sub></sub> | <b>0.83</b> $\pm$ 0.01    | <b>0.42</b> $\pm$ 0.002   | <b>0.50</b> $\pm$ 0.02   | <b>0.22</b> $\pm$ 0.002   |
| LSTM <sub>annual</sub>         | <b>0.89</b> $\pm$ 0.02    | <b>0.42</b> $\pm$ 0.006   | <b>0.51</b> $\pm$ 0.02   | <b>0.22</b> $\pm$ 0.006   |
| LSTM <sub>perm</sub>           | <b>0.86</b> $\pm$ 0.01    | <b>0.43</b> $\pm$ 0.003   | <b>0.50</b> $\pm$ 0.02   | <b>0.22</b> $\pm$ 0.003   |
| RF                             | <b>0.91</b> $\pm$ 0.00004 | <b>0.51</b> $\pm$ 0.00008 | <b>0.51</b> $\pm$ 0.0001 | <b>0.24</b> $\pm$ 0.00009 |
