# Supplementary material for: Memory effects of climate and vegetation affecting net ecosystem CO2 fluxes in global forests
Source: PubMed Central journal article supplement (PMC6364965; doi:10.1371/journal.pone.0211510), 2019-02-06
Supplement: pone.0211510.s007.pdf [file pone.0211510.s007.pdf]

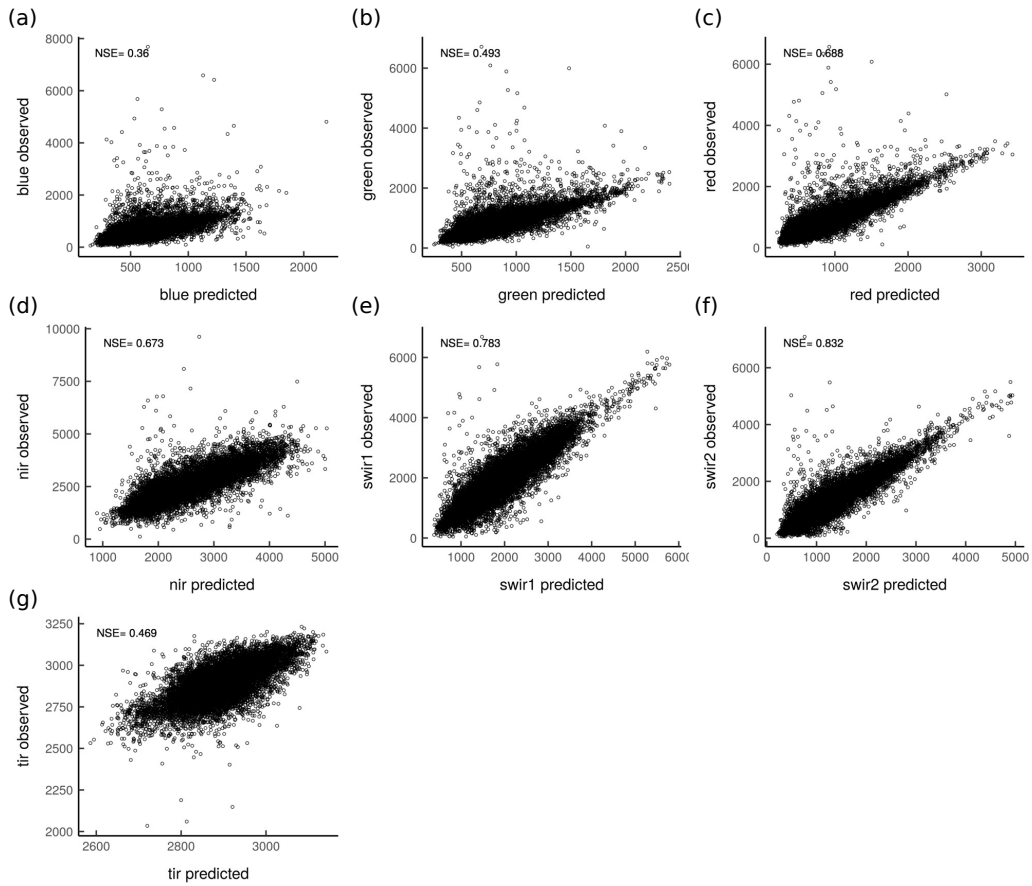

**S1 Fig.** Performance of the gap-filling procedure of each Landsat band using a Random Forest model and the MODIS bands as predictive variables. The model was trained on 70% of the data and evaluated on 30% of the left out data. nir = near-infrared, swir1 = shortwave infrared 1, swir2 = shortwave infrared 2, and tir = thermal infrared.
