# Supplementary material for: Memory effects of climate and vegetation affecting net ecosystem CO2 fluxes in global forests
Source: PLOS journal article supplement (doi:10.1371/journal.pone.0211510), 2019-02-06
Supplement: S4 (10.1371/journal.pone.0211510.s004) [file journal.pone.0211510.s004]

**S4 Table. Coefficient of determination of our proposed approach against the other model set-ups from the ensemble mean mean  $\pm$ sd estimate of the 50 runs.** *LSTM* = LSTM model using the full depth of the Landsat time series and climate data; *LSTM<sub>perm</sub>* = *LSTM* model but the temporal patterns of both the predictive and the target variables were randomly permuted while instantaneous relationships between predictive and target variables were kept; *LSTM<sub>m<sub>sc</sub></sub>* = *LSTM* model but the Landsat time series for each band were replaced by their mean seasonal cycle, while using the actual values of air temperature ( $T_{air}$ ), precipitation (P), global radiation (Rg), and vapor pressure deficit (VPD); *LSTM<sub>annual</sub>* = *LSTM* model but the Landsat time series for each band were replaced by their annual mean, while using the actual values of  $T_{air}$ , P, Rg, and VPD, RF = Random Forest model using the actual values of the Landsat time series and climate data.

|                                | Seasonal                  | Seasonal anomaly          | Across-site              | Interannual anomaly      |
|--------------------------------|---------------------------|---------------------------|--------------------------|--------------------------|
| LSTM                           | <b>0.66</b> $\pm$ 0.01    | <b>0.10</b> $\pm$ 0.006   | <b>0.43</b> $\pm$ 0.04   | <b>0.09</b> $\pm$ 0.02   |
| LSTM <sub>m<sub>sc</sub></sub> | <b>0.64</b> $\pm$ 0.01    | <b>0.05</b> $\pm$ 0.006   | <b>0.40</b> $\pm$ 0.04   | <b>0.02</b> $\pm$ 0.008  |
| LSTM <sub>annual</sub>         | <b>0.60</b> $\pm$ 0.02    | <b>0.07</b> $\pm$ 0.008   | <b>0.37</b> $\pm$ 0.04   | <b>0.07</b> $\pm$ 0.01   |
| LSTM <sub>perm</sub>           | <b>0.62</b> $\pm$ 0.01    | <b>0.08</b> $\pm$ 0.005   | <b>0.39</b> $\pm$ 0.04   | <b>0.11</b> $\pm$ 0.02   |
| RF                             | <b>0.58</b> $\pm$ 0.00003 | <b>0.06</b> $\pm$ 0.00003 | <b>0.39</b> $\pm$ 0.0001 | <b>0.07</b> $\pm$ 0.0004 |
