# Supplementary material for: Memory effects of climate and vegetation affecting net ecosystem CO2 fluxes in global forests
Source: PLOS journal article supplement (doi:10.1371/journal.pone.0211510), 2019-02-06
Supplement: S9 (10.1371/journal.pone.0211510.s009) [file journal.pone.0211510.s009]

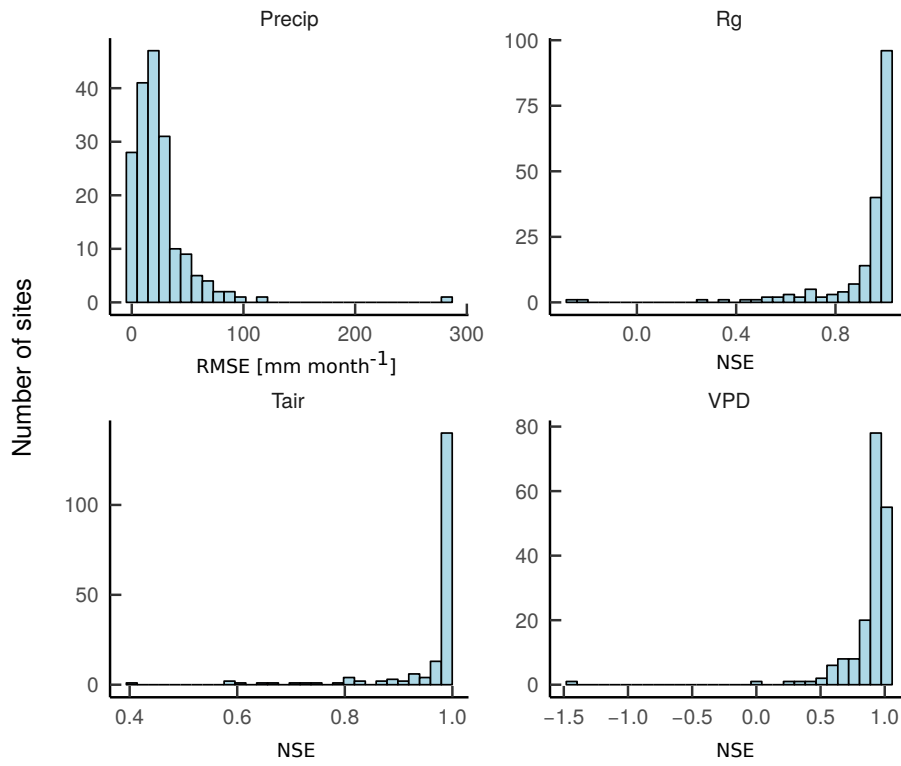

**S3 Fig. Performance of the gap-filling procedure for the different climate variables.** Assessment of the gap-filling procedure was done for  $T_{air}$ , Precip, Rg, and VPD. For  $T_{air}$ , Rg, and VPD, the Nash-Sutcliffe efficiency (NSE) is reported, while the root mean squared error (RMSE) is reported for Precip.
